# Supplementary material for: The access of Trichoderma reesei 6A to cellulose is blocked by isolated hemicelluloses and their derivatives in biomass hydrolysis
Source: Royal Society of Chemistry journal article supplement (doi:10.1039/c6ra14617a), 2016-01-01
Supplement: c6ra14617a1.pdf [file c6ra14617a1.pdf]

## Supplementary Information (SI)

For

### **The access of *Trichoderma reesei* 6A to cellulose is blocked by isolated hemicelluloses and their derivatives in biomass hydrolysis**

Donglin Xin, Ming Yang, Xiang Chen and Junhua Zhang\*

College of Forestry, Northwest A&F University, Yangling 712100, Shaanxi, China

\*Corresponding author

E-mail: junhuazhang@nwsuaf.edu.cn (J. Zhang)

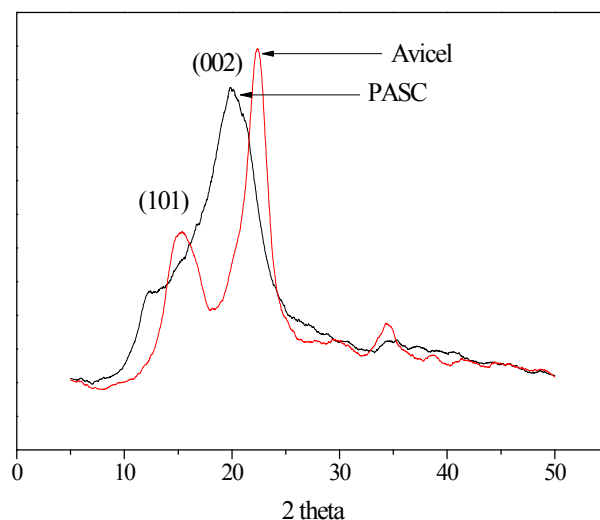

**Figure S1.** XRD analysis of Avicel and phosphoric acid swollen cellulose (PASC).

The cellulose crystallinity index (CI) of the samples was measured by XRD using a Rigaku D/max-3C generator (Rigaku Corporation, Japan). The dried samples were scanned in  $2\theta$  range from  $5^\circ$  to  $50^\circ$  using the steps of  $0.02^\circ$  in width, and using Cu/ $K\alpha$  radiation ( $1.54 \text{ \AA}$ ) generated at 35 kV and 35 mA. The CI of cellulose was calculated from the XRD spectra as follows:

$$\text{CrI} = \frac{I_{002} - I_{\text{am}}}{I_{002}} \times 100$$

In which  $I_{002}$  is the maximum intensity of the (002) lattice diffraction, and  $I_{\text{am}}$  is the peak of the amorphous portion evaluated as the minimum intensity between the (101) and (002) lattice planes.
